# Supplementary material for: BMSC-Derived Exosomal CircHIPK3 Promotes Osteogenic Differentiation of MC3T3-E1 Cells via Mitophagy
Source: MDPI journal article supplement (doi:10.3390/ijms24032785), 2023-02-01
Supplement: s1 [file s1]

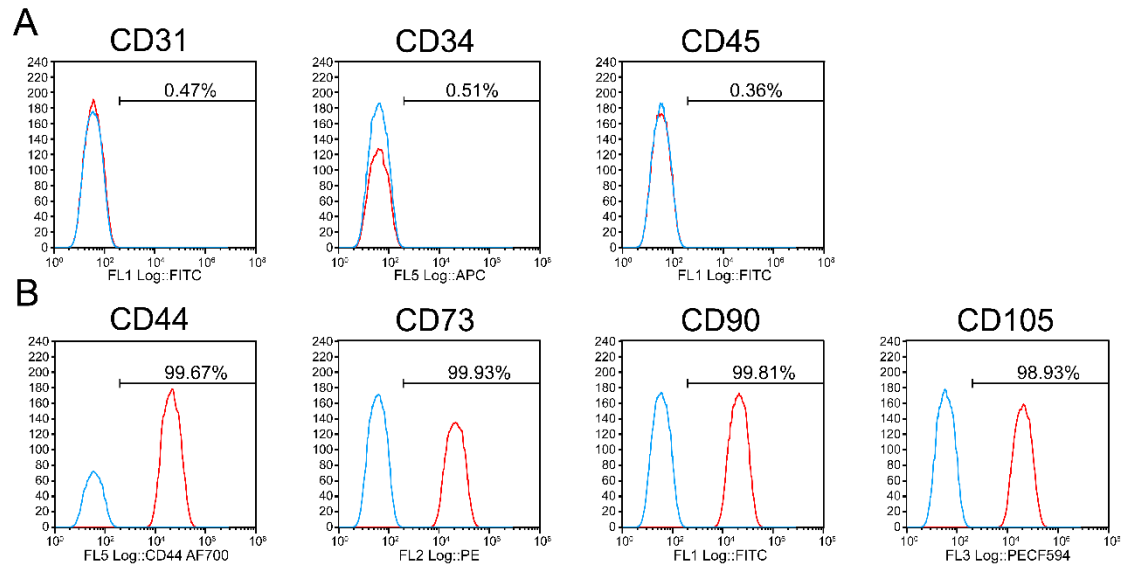

**Figure S1.** BMSC characterization using flow cytometry. The cells were positive for CD44, CD73, CD90, and CD105 (A) and negative for CD31, CD34 and CD45 (B). BMSC: Bone marrow mesenchymal stem cell.

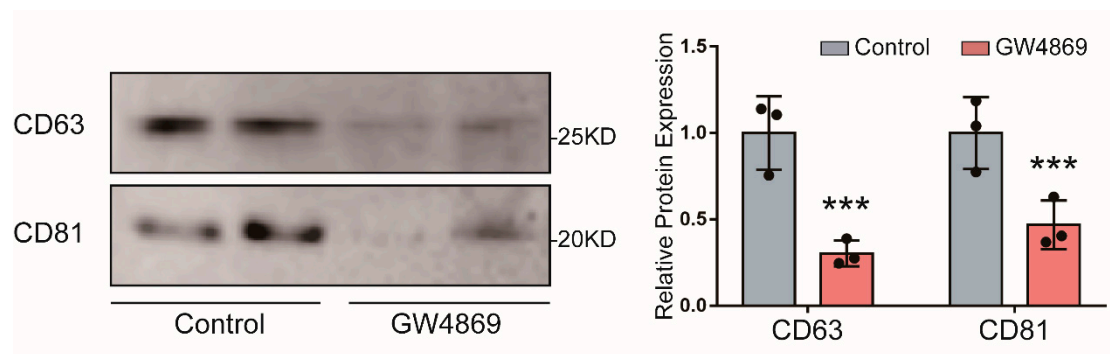

**Figure S2.** GW4869 administration inhibits exosome release. Seven days post GW4869 administration, exosomes were collected from supernatant of BMSCs. (A) and western blot (B) analyses. ( $n=3$ ). \*\*\*  $p<0.001$ .

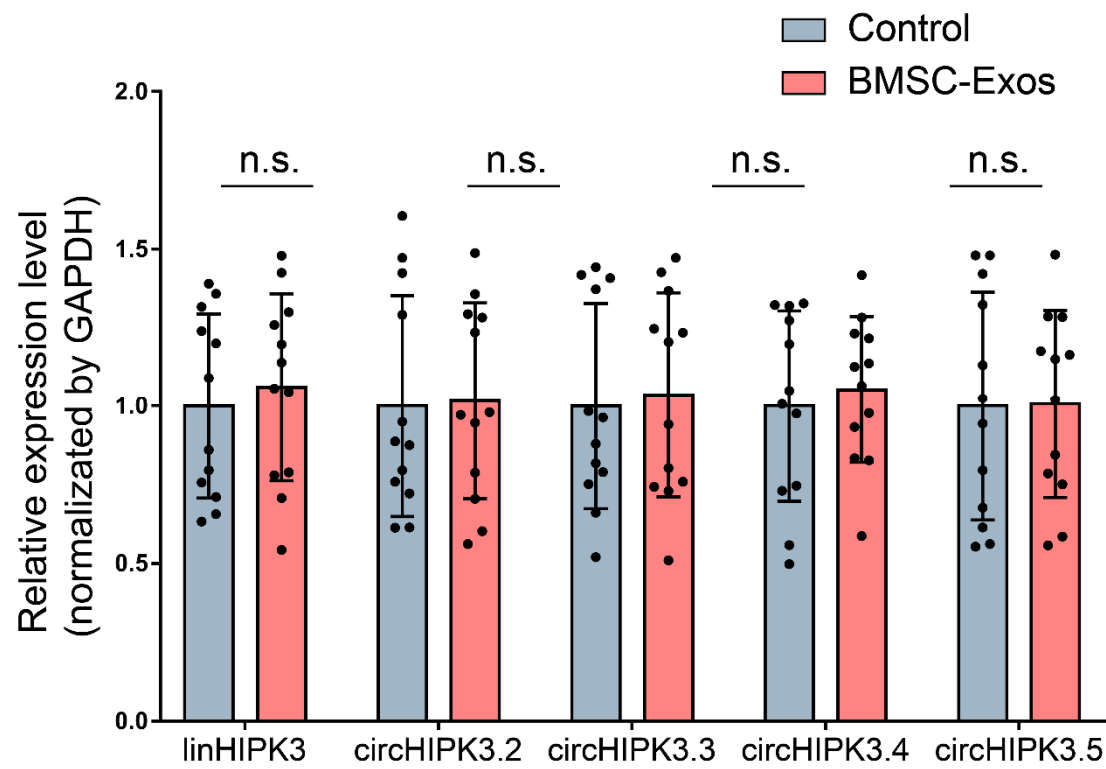

**Figure S3.** The relative expressions of linHIPK3 and the other homologous circRNAs of circHIPK3 in MC3T3-E1 cells treated with or without BMSC-Exos.  $n=12$ . *n.s.*, nonsignificant.
